# Supplementary material for: Pillar[5]arene-based [1]rotaxanes with salicylaldimine as the stopper: synthesis, characterization and application in the fluorescence turn-on sensing of Zn2+ in water
Source: Royal Society of Chemistry journal article supplement (doi:10.1039/d2cc02893j), 2022-01-01
Supplement: d2cc02893j1.pdf [file d2cc02893j1.pdf]

# Pillar[5]arene-based [1]rotaxanes with salicylaldimine as the stopper: syntheses, characterizations and application in the fluorescence turn-on sensing of Zn<sup>2+</sup> in water

Longtao Ma,<sup>1,2,§</sup> Ruowen Tang,<sup>1,§</sup> Youjun Zhou,<sup>1</sup> Jiali Bei,<sup>1</sup> Yang Wang,<sup>1,\*</sup> Tingting Chen,<sup>1,\*</sup> Changjin Ou,<sup>1</sup> Yang Wang\*, Ying Han,<sup>2,\*</sup> Chaoguo Yan,<sup>2</sup> and Yong Yao<sup>1,\*</sup>

<sup>1</sup>School of Chemistry and Chemical Engineering, Nantong University, Nantong, Jiangsu, 226019, P. R. China.

<sup>2</sup>School of Chemistry and Chemical Engineering, Yangzhou University, Yangzhou, Jiangsu, 225001, P.R. China.

Email: ywang85@ntu.edu.cn; ttchen1980@126.com; Hanying@yzu.edu.cn; yaoyong1986@ntu.edu.cn

## Supporting Information (23 pages)

|    |                                      |     |
|----|--------------------------------------|-----|
| 1. | Materials and methods                | S2  |
| 2. | Syntheses of <b>1a</b> and <b>1b</b> | S3  |
| 3. | Syntheses of <b>2a</b> and <b>2b</b> | S7  |
| 4. | Synthesis of <b>M2</b>               | S16 |
| 5. | Synthesis of <b>2b-Zn</b>            | S18 |
| 6. | Fluorescence investigation           | S19 |

## 1. Materials and methods

### Materials

All reagents were commercially available and used as supplied without further purification. Solvents were either employed as purchased or dried according to procedures described in the literature. Pillar[5]arene P5 was prepared according previous report.<sup>S1,S2</sup>

### Measurements

<sup>1</sup>H NMR and <sup>13</sup>C HMR spectra were recorded with a Bruker Avance DMX-400 spectrometer or a Bruker Avance DMX-600 spectrometer using the deuterated solvent as the lock and the residual solvent or TMS as the internal reference. NOESY spectra were collected on a Bruker Avance DMX-500 or Bruker Avance DMX-600 spectrometer with internal standard TMS. High-resolution mass spectrometric experiments were performed with a Bruker 7-Tesla FT-ICR mass spectrometer equipped with an electrospray source (Billerica, MA, USA). Steady-state fluorescence spectra were recorded in a conventional quartz cell (light path 10 mm) on a Varian Cary Eclipse equipped with a Varian Cary single-cell peltier accessory to control temperature. Single crystal data was collected by Bruker AXS (SMART APEX II) Instrument.

## 2. Syntheses of **1a** and **1b**

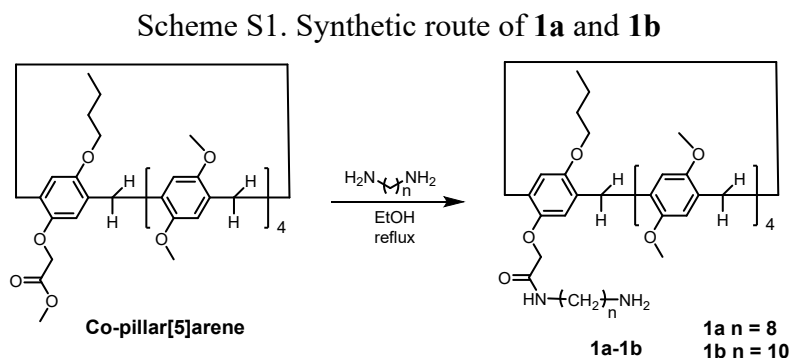

Synthesis of compound **1**: A suspension of monoester copillar[5]arene (2.0 mmol, 1.70 g) and excess of  $\alpha,\omega$ -diaminoalkanes (80 mmol) in ethanol (20 mL) was refluxed for 8 hours. After cooling, the resulting precipitate was collected by filtration and washed with cold ethanol to give the white solid (**1a** and **1b**) for analysis.

**1a**: White solid, 50%, m.p.155-157°C;  $^1\text{H}$  NMR (400 MHz,  $\text{CDCl}_3$ )  $\delta$ : 6.93 – 6.82 (m, 9H, ArH), 6.74 (d,  $J = 7.7$  Hz, 1H, ArH), 5.19 (s, 1H, NH), 4.57 (s, 2H,  $\text{CH}_2$ ), 3.89 (m, 3H,  $\text{CH}_2$ ), 3.80 – 3.71 (m, 34H, 8  $\text{OCH}_3$ , 5  $\text{CH}_2$ ), 3.63 (s, 1H,  $\text{CH}_2$ ), 2.66 (t,  $J = 7.2$  Hz, 2H,  $\text{CH}_2$ ), 1.88 – 1.81 (m, 2H,  $\text{CH}_2$ ), 1.61 (m, 2H,  $\text{CH}_2$ ), 1.23 (m, 2H,  $\text{CH}_2$ ), 1.04 (t,  $J = 7.4$  Hz, 3H,  $\text{CH}_3$ ), 0.69 (m, 2H,  $\text{CH}_2$ ), -0.12 (s, 2H,  $\text{CH}_2$ ), -1.15 (s, 2H,  $\text{CH}_2$ ), -1.39 (s, 2H,  $\text{CH}_2$ ), -2.22 (s, 2H,  $\text{CH}_2$ );  $^{13}\text{C}$  NMR (101 MHz,  $\text{CDCl}_3$ )  $\delta$ : 167.3, 150.8, 150.4, 150.4, 150.3, 150.3, 150.2, 150.0, 147.0, 129.4, 129.1, 128.4, 128.3, 128.2, 128.1, 128.0, 127.8, 127.3, 126.9, 114.9, 114.1, 113.9, 113.5, 112.8, 112.7, 112.5, 112.4, 68.0, 66.0, 55.7, 55.6, 55.5, 55.4, 55.3, 55.1, 42.8, 38.0, 34.8, 32.1, 30.1, 29.3, 29.2, 28.9, 28.6, 28.5, 28.4, 27.7, 26.7, 23.7, 19.6, 14.1; IR(KBr)  $\nu$ : 3404.05, 2932.50, 2855.13, 2482.04, 2145.84, 2039.04, 1678.90, 1610.10, 1500.35, 1464.81, 1399.98, 1306.58, 1213.24, 1100.97, 1047.92, 928.69, 878.14, 854.71, 774.01, 704.73, 647.36, 604.78, 541.10, 454.15  $\text{cm}^{-1}$ ; MS (m/z): HRMS (ESI) Calcd. for  $\text{C}_{57}\text{H}_{75}\text{N}_2\text{O}_{11}$  ( $[\text{M} + \text{H}]^+$ ): 963.5371, found: 963.5392.

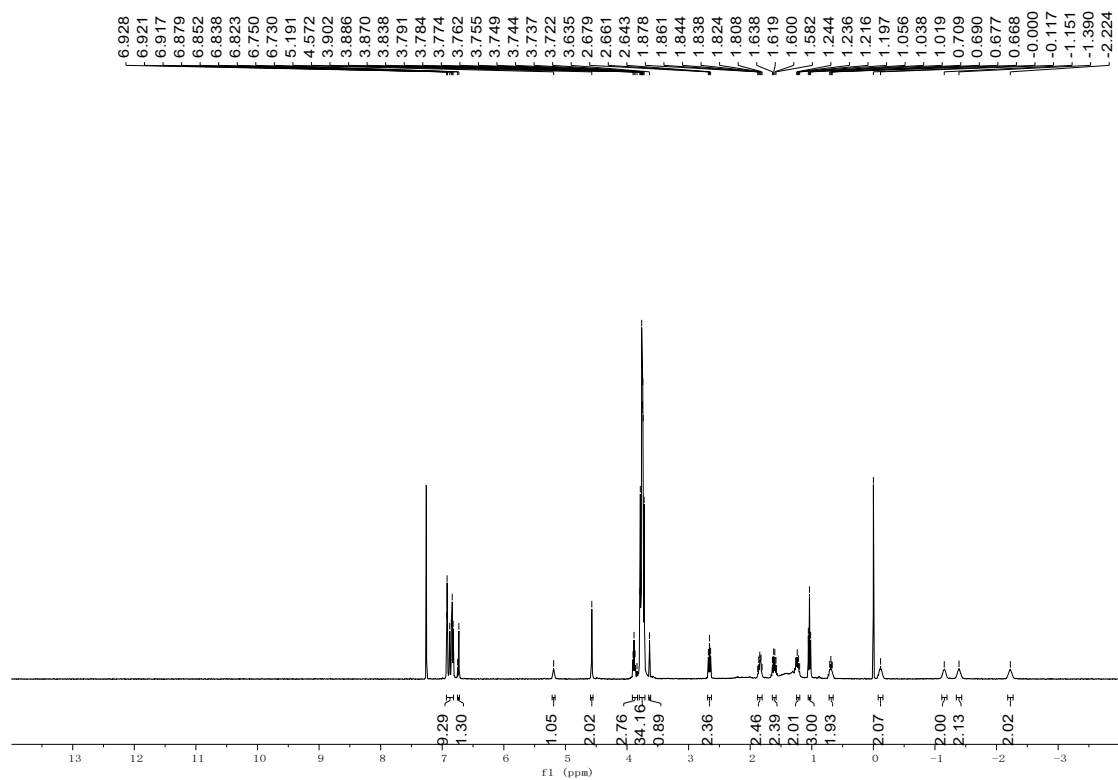

**Figure S1.**  $^1\text{H}$  NMR spectrum (400 MHz,  $\text{CDCl}_3$ , 293 K) of **1a**.

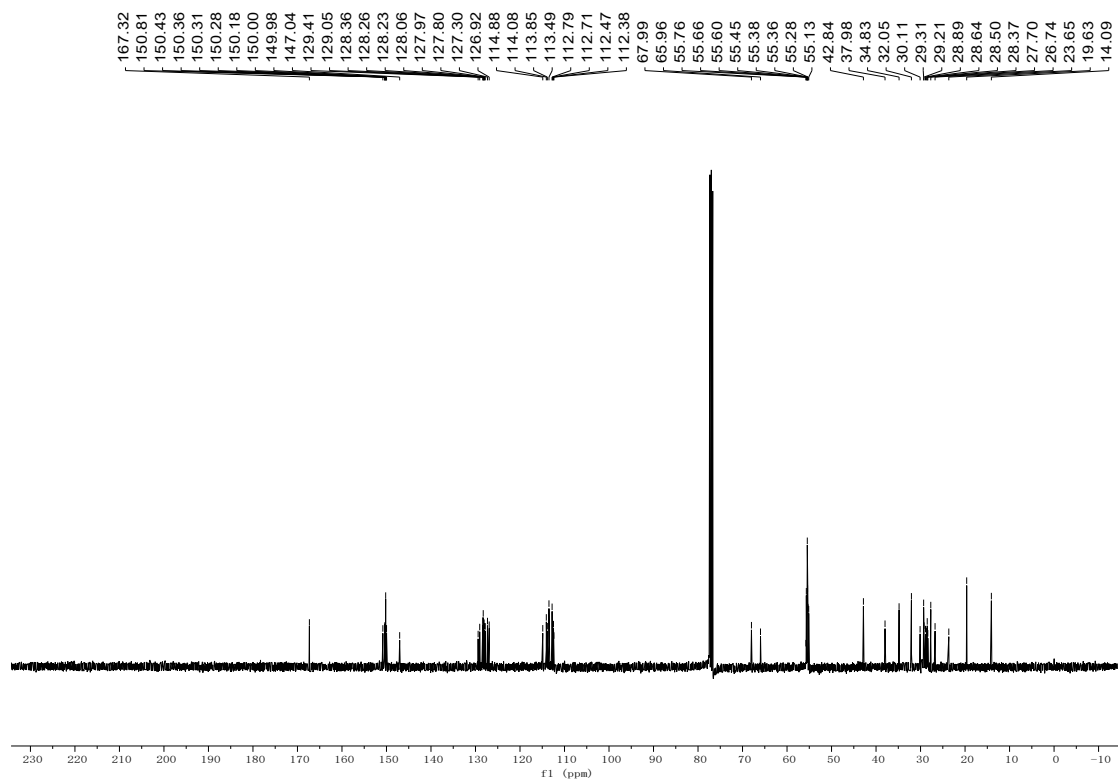

**Figure S2.**  $^{13}\text{C}$  NMR spectrum ( $\text{CDCl}_3$ , room temperature, 100 MHz) of **1a**.

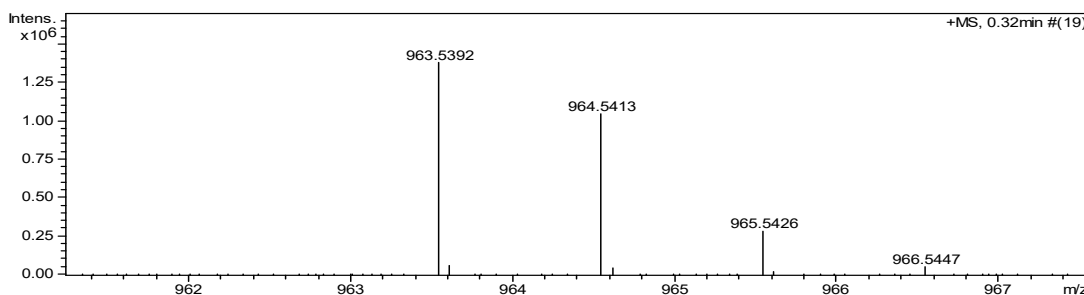

**Figure S3.** Mass spectra of **1a** Calcd. for  $C_{57}H_{74}N_2O_{11}([M + H]^+)$ : 963.5371, found: 963.5392.

**1b:** White solid, 40%, m.p.130-131°C;  $^1H$  NMR (400 MHz,  $CDCl_3$ )  $\delta$ : 6.94 – 6.82 (m, 9H, ArH), 6.72 (s, 1H, ArH), 5.10 (s, 1H, NH), 4.57 (s, 2H,  $CH_2$ ), 3.88 (m, 3H,  $CH_2$ ), 3.82 – 3.70 (m, 34H, 8  $OCH_3$ , 5  $CH_2$ ), 3.64 (s, 1H,  $CH_2$ ), 2.73 (t,  $J = 7.1$  Hz, 2H,  $CH_2$ ), 1.84 (t,  $J = 7.5$  Hz, 2H,  $CH_2$ ), 1.62 – 1.57 (t,  $J = 7.6$  Hz, 2H,  $CH_2$ ), 1.49 – 1.45 (t,  $J = 7.6$  Hz, 2H,  $CH_2$ ), 1.32 (d,  $J = 7.2$  Hz, 2H,  $CH_2$ ), 1.16 (d,  $J = 8.0$  Hz, 2H,  $CH_2$ ), 1.04 (t,  $J = 7.4$  Hz, 3H,  $CH_3$ ), 0.77 (s, 2H,  $CH_2$ ), -0.06 (s, 2H,  $CH_2$ ), -1.31 (s, 4H,  $CH_2$ ), -2.29 (s, 2H,  $CH_2$ );  $^{13}C$  NMR (101 MHz,  $CDCl_3$ )  $\delta$ : 167.2, 150.8, 150.7, 150.4, 150.3, 150.1, 150.1, 150.0, 147.0, 129.4, 129.0, 128.3, 128.2, 128.1, 128.0, 127.8, 127.1, 126.8, 114.7, 114.0, 113.9, 113.6, 113.2, 112.8, 112.7, 112.5, 112.4, 67.8, 65.9, 55.4, 55.3, 55.2, 55.1, 42.4, 38.0, 34.2, 32.1, 30.9, 30.8, 29.7, 29.2, 28.9, 28.7, 28.3, 27.8, 26.5, 23.6, 19.6, 14.1; IR (KBr)  $\nu$ : 3407.95, 2930.79, 2853.95, 2146.30, 2039.48, 1680.45, 1499.90, 1464.94, 1399.77, 1304.96, 1213.17, 1101.25, 1048.14, 929.12, 878.58, 855.36, 774.36, 704.94, 647.41, 606.87, 541.77, 451.37  $cm^{-1}$ ; MS (m/z): HRMS (ESI) Calcd. for  $C_{59}H_{79}N_2O_{11}([M + H]^+)$ : 991.5684, found: 991.5709.

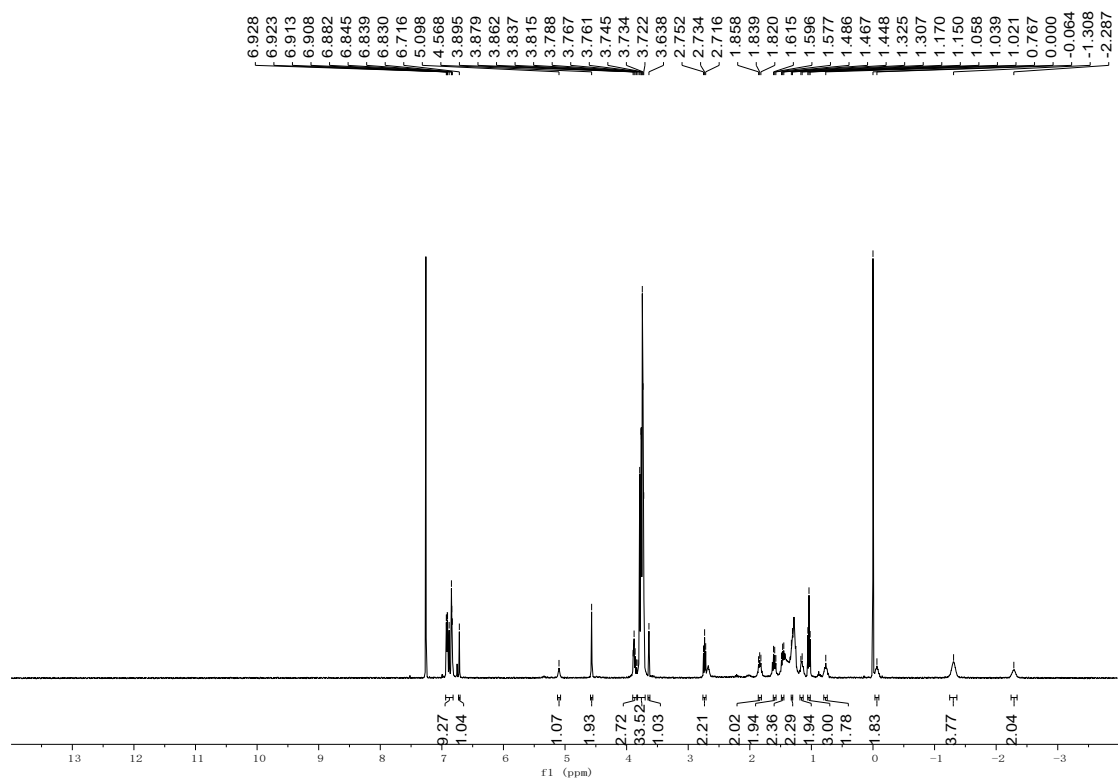

Figure S4  $^1\text{H}$  NMR spectrum (400 MHz,  $\text{CDCl}_3$ , 293 K) of **1b**.

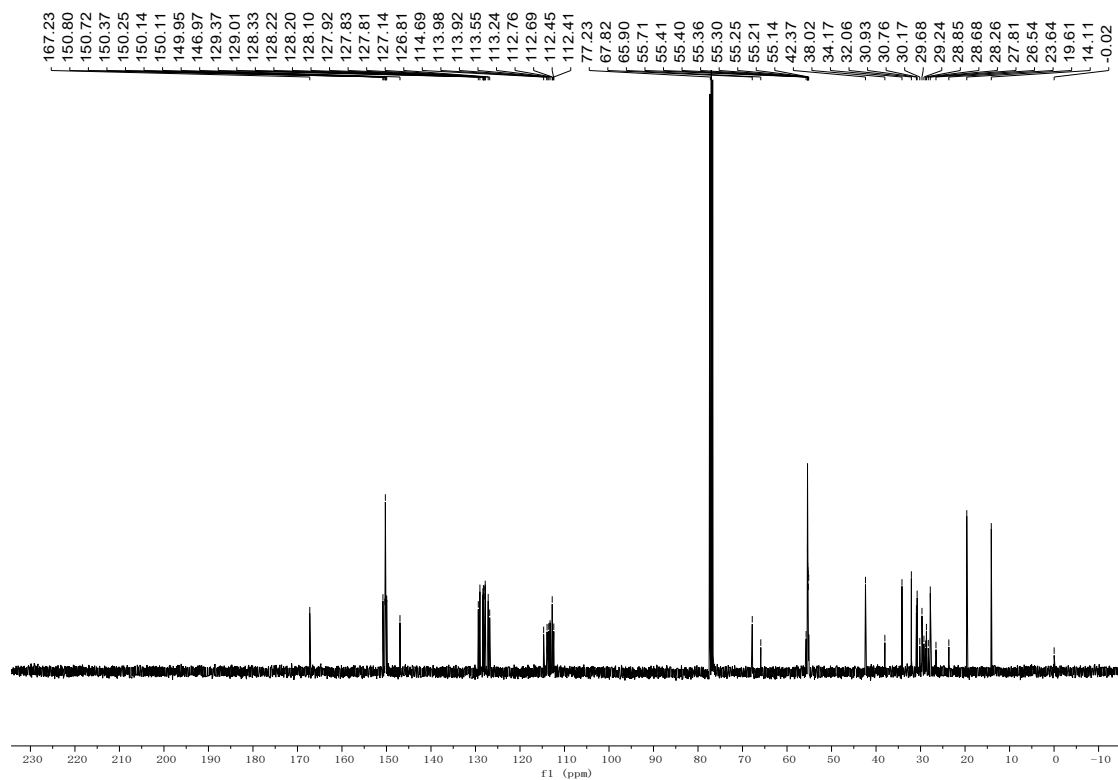

Figure S5  $^{13}\text{C}$  NMR spectrum ( $\text{CDCl}_3$ , room temperature, 100 MHz) of **1b**.

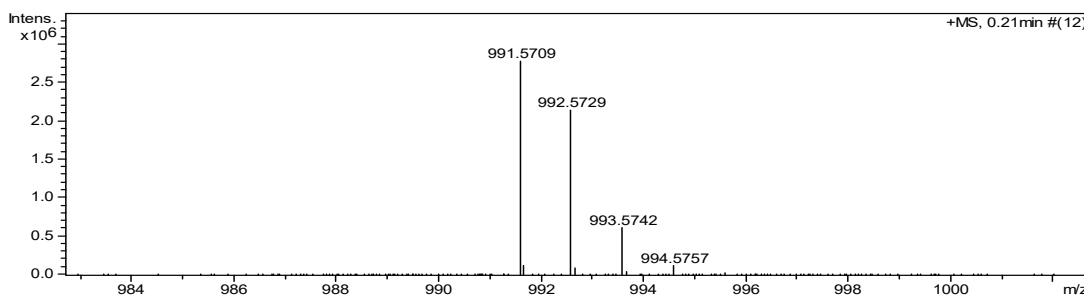

**Figure S6** Mass spectra of **1b** Calcd. for  $C_{59}H_{78}N_2O_{11}([M + H]^+)$ : 991.5684, found: 991.5709.

3.

### Syntheses of **2a** and **2b**

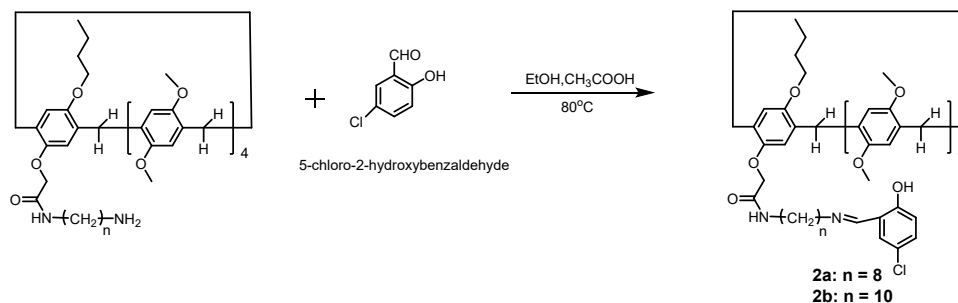

Scheme S2. Synthetic route of **2a** and **2b**

Synthesis of compound **2**: 0.33 mmol compound **1a** (or **1b**) was dissolved in 15 mL  $CH_3CH_2OH$  and heated to  $80^\circ C$ , then 2 drops of  $CH_3COOH$  and 0.3 mmol of 5-chloro-2-hydroxybenzaldehyde was added, the mixture was further reaction for 6h. After cooling, the resulting precipitate was collected by filtration and washed with cold ethanol to give the light yellow solid (**2a** and **2b**) for analysis.

**2a:** Yellow solid, 77%, m.p.107-108°C;  $^1\text{H}$  NMR (400 MHz,  $\text{CDCl}_3$ )  $\delta$ : 13.48 (s, 1H, OH), 8.31 (s, 1H, CH), 7.27 (m, 2H, ArH), 6.98 – 6.81 (m, 10H, ArH), 6.72 (s, 1H, ArH), 5.09 (s, 1H, NH), 4.57 (s, 2H,  $\text{CH}_2$ ), 3.87 (m, 2H,  $\text{CH}_2$ ), 3.80 – 3.69 (m, 32H,  $8\text{OCH}_3, 4\text{CH}_2$ ), 3.58 (t,  $J = 7.2$  Hz, 2H,  $\text{CH}_2$ ), 2.48 (s, 2H,  $\text{CH}_2$ ), 1.81 (t, 2H,  $\text{CH}_2$ ), 1.53 (m, 4H,  $\text{CH}_2$ ), 0.99 (t,  $J = 7.4$  Hz, 3H,  $\text{CH}_3$ ), 0.81 (d,  $J = 10.9$  Hz, 2H,  $\text{CH}_2$ ), -0.10 (s, 2H,  $\text{CH}_2$ ), -1.33 (s, 4H,  $\text{CH}_2$ ), -2.28 (s, 2H,  $\text{CH}_2$ );  $^{13}\text{C}$  NMR (101 MHz,  $\text{CDCl}_3$ )  $\delta$ : 167.3, 163.3, 159.9, 150.8, 150.4, 150.4, 150.3, 150.3, 150.2, 150.1, 150.0, 147.1, 132.1, 130.1, 129.5, 129.1, 128.4, 128.3, 128.2, 128.1, 127.9, 127.9, 127.3, 126.9, 123.2, 119.4, 118.7, 115.0, 114.1, 113.7, 113.5, 113.5, 112.8, 112.4, 68.1, 65.9, 60.3, 55.7, 55.6, 55.4, 55.3, 55.1, 38.1, 32.1, 31.8, 30.2, 29.3, 29.2, 28.9, 28.7, 28.5, 28.3, 28.1, 26.3, 23.6, 19.6, 14.1; IR (KBr)  $\nu$ : 3410, 2935, 2840, 2481, 2143, 2037, 1738, 1680, 1634, 1498, 1398, 1284, 1211, 1044, 926, 872, 822, 772, 705, 644, 553, 454  $\text{cm}^{-1}$ ; MS (m/z): HRMS (ESI) Calcd. for  $\text{C}_{64}\text{H}_{77}\text{ClN}_2\text{O}_{12}\text{Na}$  ( $[\text{M} + \text{Na}]^+$ ): 1123.5063, found: 1123.5039.

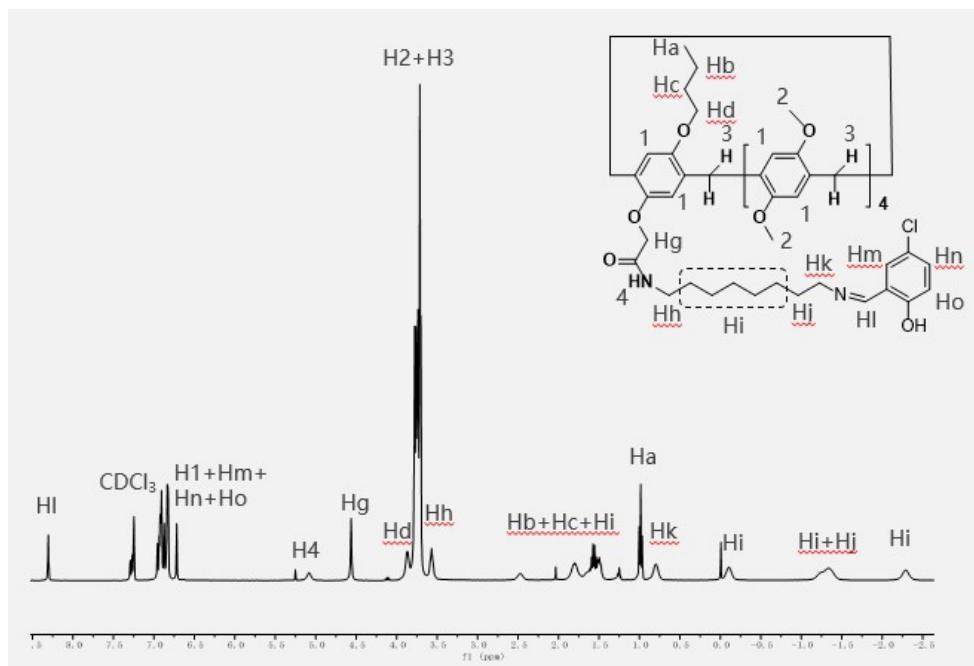

**Figure S7.**  $^1\text{H}$  NMR spectrum (400 MHz,  $\text{CDCl}_3$ , 293 K) of **2a**.



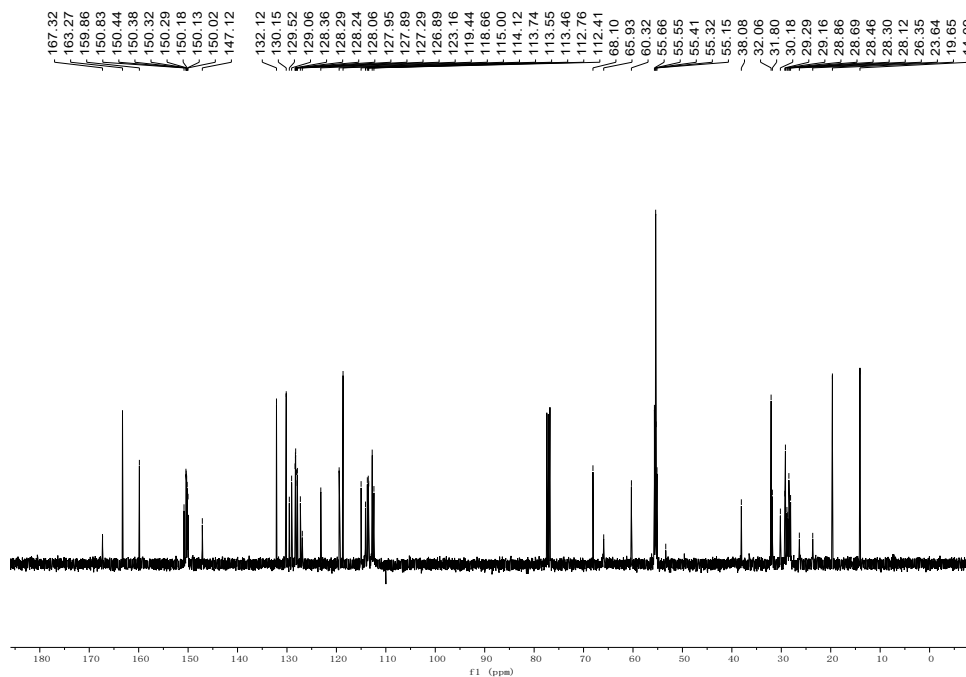

**Figure S8.**  $^{13}\text{C}$  NMR spectrum ( $\text{CDCl}_3$ , room temperature, 100 MHz) of **2a**.

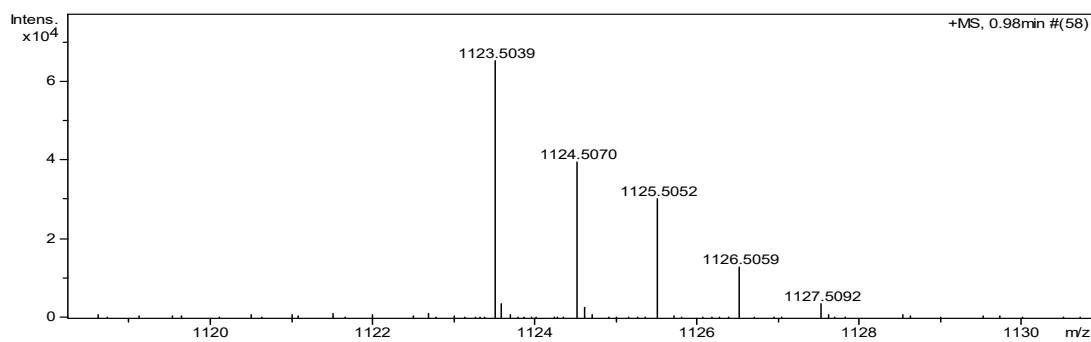

**Figure S9** Mass spectra of **2a** Calcd. for  $\text{C}_{64}\text{H}_{77}\text{ClN}_2\text{O}_{12}([\text{M} + \text{Na}]^+)$ : 1123.5063, found: 1123.5039.

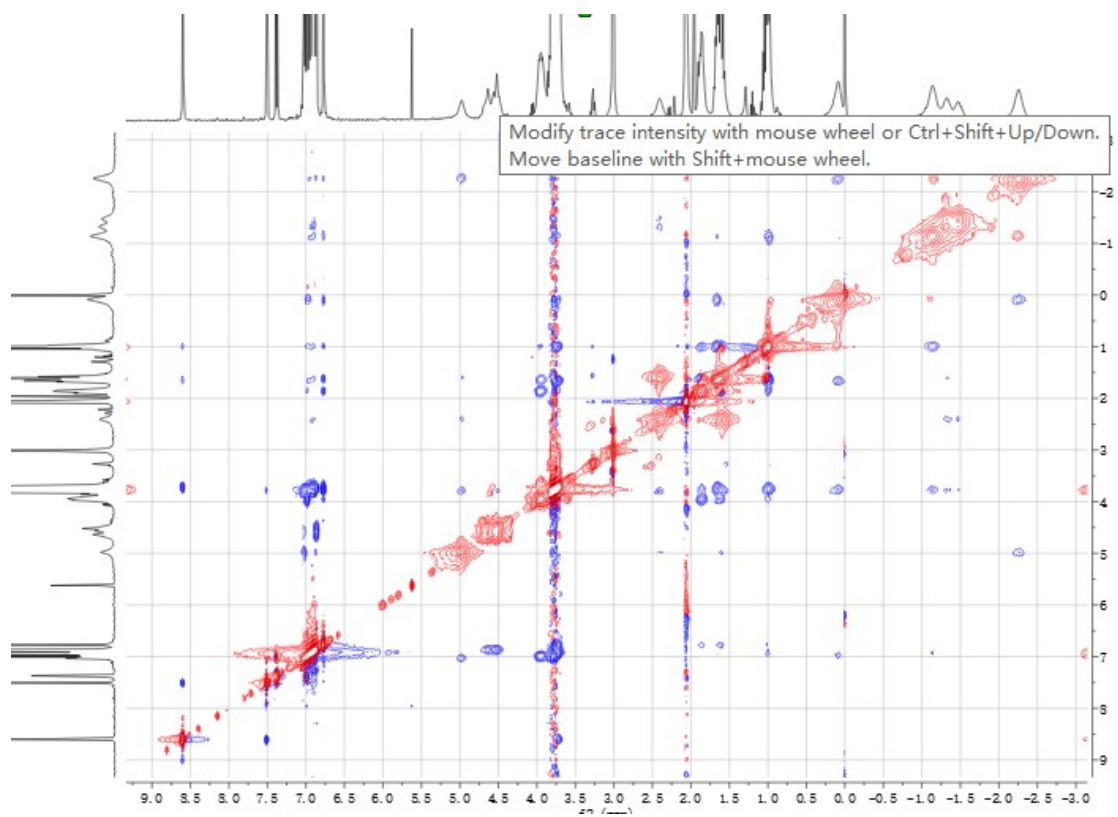

**Figure S10.** 2D NMR of **2a**.

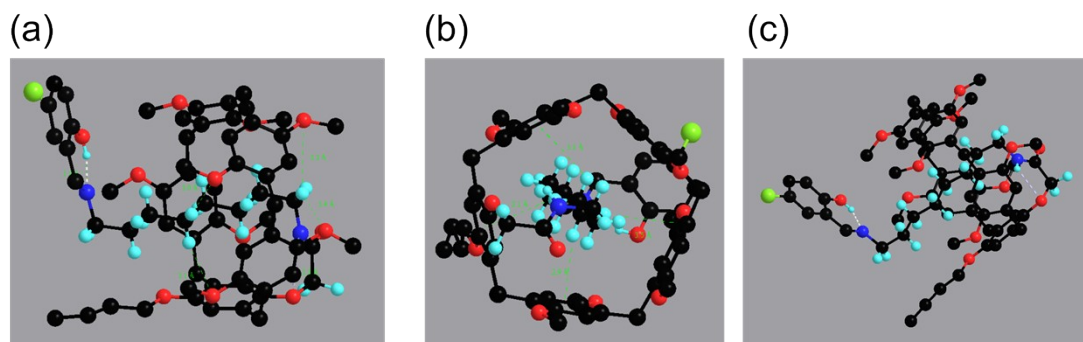

**Figure S11.** Ball and stick views of the X-ray single-crystal structure of [1]rotaxane **2a**. (a) C–H···O interactions. (b) C–H··· $\pi$  interactions. (c) N–H···O and O–H···N hydrogen bondings.

**Table S1 Information of crystal data for 2a**

| Phase                                           |                                                                  |
|-------------------------------------------------|------------------------------------------------------------------|
| Empirical formula                               | C <sub>64</sub> H <sub>77</sub> ClN <sub>2</sub> O <sub>12</sub> |
| Formula weight                                  | 1101.72                                                          |
| Temperature(K)                                  | 296(2)                                                           |
| Wavelength(Å)                                   | 0.71073                                                          |
| Crystal system,<br>space group                  | Monoclinic<br>P2(1)/n                                            |
| a(Å)                                            | 12.4109(17)                                                      |
| b(Å)                                            | 19.955(3)                                                        |
| c(Å)                                            | 25.114(4)                                                        |
| α(°)                                            | 90                                                               |
| β(°)                                            | 96.541(4)                                                        |
| γ(°)                                            | 90                                                               |
| Volume(Å <sup>3</sup> )                         | 6179.1(16)                                                       |
| Z                                               | 4                                                                |
| Calculated density(Mg·m <sup>-3</sup> )         | 1.184                                                            |
| Absorption coefficient(mm <sup>-1</sup> )       | 0.122                                                            |
| F(000)                                          | 2352                                                             |
| Crystal size(mm)                                | 0.220 x 0.200 x 0.180                                            |
| Theta range for data collection(°)              | 2.032 to 24.999                                                  |
| <i>hkl</i> ranges                               | -14 to 14, -23 to 23, -29 to 27                                  |
| Reflections collected                           | 62354 / 10837                                                    |
| unique                                          | R(int)= 0.1423                                                   |
| Completeness to theta                           | 99.7%                                                            |
| Absorption correction                           | Semi-empirical from equivalents                                  |
| Refinement method                               | Full-matrix least-squares on F <sup>2</sup>                      |
| Data/restraints/parameters                      | 10837 / 36 / 722                                                 |
| Goodness-of-fit on F <sup>2</sup>               | 0.961                                                            |
| Final R indices [I>2σ(I)]                       | R <sub>1</sub> = 0.0881,<br>wR <sub>2</sub> = 0.2210             |
| R indices (all data)                            | R <sub>1</sub> = 0.2344,<br>wR <sub>2</sub> = 0.2629             |
| Largest diff. peak and Hole(e·Å <sup>-3</sup> ) | 0.435 and -0.417                                                 |

**2b**: Yellow solid, 77%, m.p.86-87°C;  $^1\text{H}$  NMR (400 MHz,  $\text{CDCl}_3$ )  $\delta$ : 13.54 (s, 1H, OH), 8.32 (s, 1H, CH), 7.30 – 7.26 (t,  $J = 2.4\text{Hz}$ , 1H, ArH), 7.25 (d,  $J = 2.4\text{ Hz}$ , 1H, ArH), 6.95 – 6.87 (m, 6H, ArH), 6.85 – 6.82 (t,  $J = 3.6\text{Hz}$ , 4H, ArH), 6.71 (s, 1H, ArH), 5.06 (s, 1H, NH), 4.57 (s, 2H,  $\text{CH}_2$ ), 3.87 (m, 2H,  $\text{CH}_2$ ), 3.79 – 3.71 (m, 34H,  $8\text{OCH}_3$ ,  $5\text{CH}_2$ ), 3.65 (t,  $J = 6.8\text{ Hz}$ , 2H,  $\text{CH}_2$ ), 2.46 (s, 2H,  $\text{CH}_2$ ), 1.83 (s, 2H,  $\text{CH}_2$ ), 1.73 (t,  $J = 7.8\text{ Hz}$ , 2H,  $\text{CH}_2$ ), 1.62 (s, 1H,  $\text{CH}_2$ ), 1.57 (d,  $J = 7.4\text{ Hz}$ , 1H,  $\text{CH}_2$ ), 1.39 (t,  $J = 7.8\text{ Hz}$ , 2H,  $\text{CH}_2$ ), 1.19 (t,  $J = 7.8\text{ Hz}$ , 2H,  $\text{CH}_2$ ), 1.01 (t,  $J = 7.4\text{ Hz}$ , 3H,  $\text{CH}_3$ ), 0.77 (s, 2H,  $\text{CH}_2$ ), -0.08 (s, 2H,  $\text{CH}_2$ ), -1.37 (s, 4H,  $\text{CH}_2$ ), -2.35 (s, 2H,  $\text{CH}_2$ );  $^{13}\text{C}$  NMR (101 MHz,  $\text{CDCl}_3$ )  $\delta$  167.3, 163.5, 159.9, 150.8, 150.4, 150.3, 150.3, 150.1, 150.0, 132.0, 130.2, 129.4, 129.0, 128.3, 128.2, 128.1, 128.0, 127.9, 127.8, 127.2, 126.8, 123.1, 119.5, 118.6, 114.7, 114.0, 113.6, 113.3, 112.7, 112.4, 67.8, 65.9, 59.7, 55.5, 55.4, 55.4, 55.3, 55.1, 38.0, 32.1, 31.2, 30.8, 30.6, 30.2, 29.7, 29.3, 28.8, 28.6, 28.3, 28.1, 26.5, 23.6, 19.6, 14.1; IR(KBr)  $\nu$ : 3410, 2935, 2841, 2038, 1680, 1633, 1499, 1462, 1398, 1283, 1210, 1044, 928, 872, 822, 772, 708, 642, 551, 455  $\text{cm}^{-1}$ ; MS (m/z): HRMS (ESI) Calcd. for  $\text{C}_{66}\text{H}_{81}\text{ClN}_2\text{O}_{12}\text{Na}$  ( $[\text{M} + \text{Na}]^+$ ): 1151.5376, found: 1151.5363.

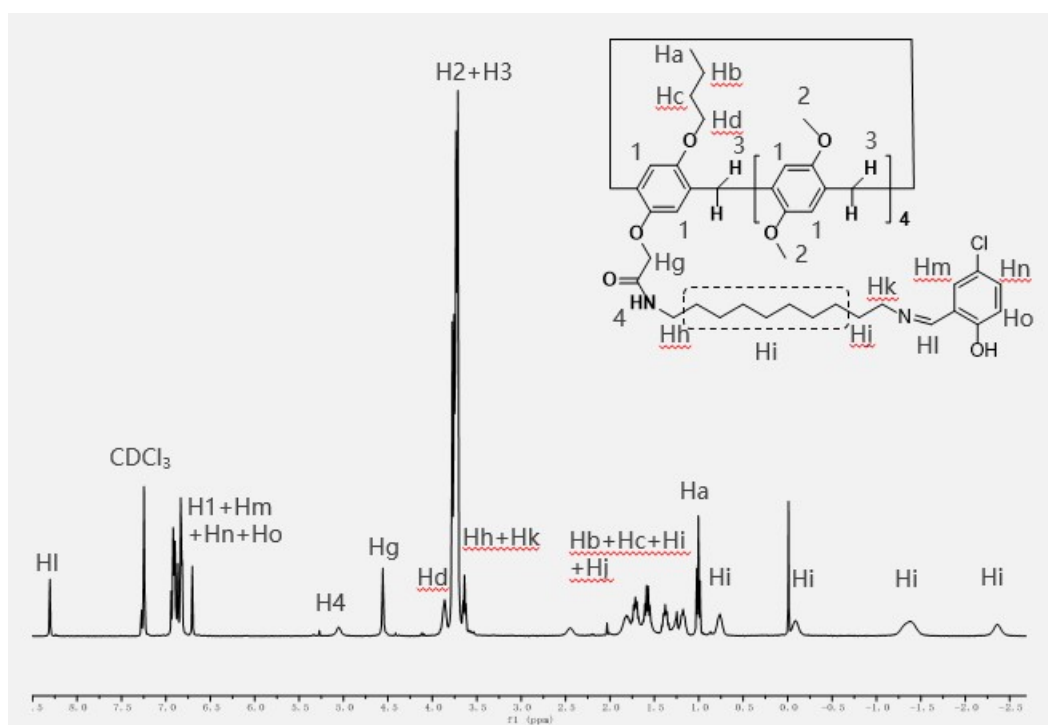

**Figure S12.**  $^1\text{H}$  NMR spectrum (400 MHz,  $\text{CDCl}_3$ , 293 K) of **2b**.

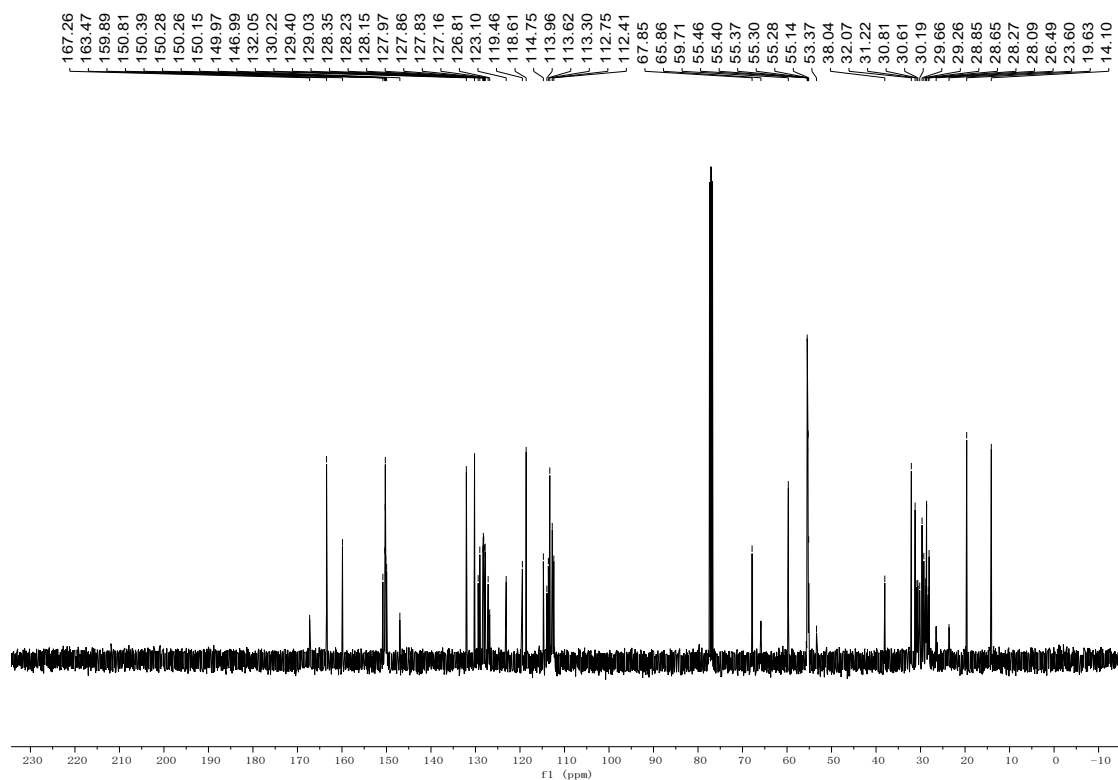

**Figure S13.**  $^{13}\text{C}$  NMR spectrum ( $\text{CDCl}_3$ , room temperature, 100 MHz) of **2b**.

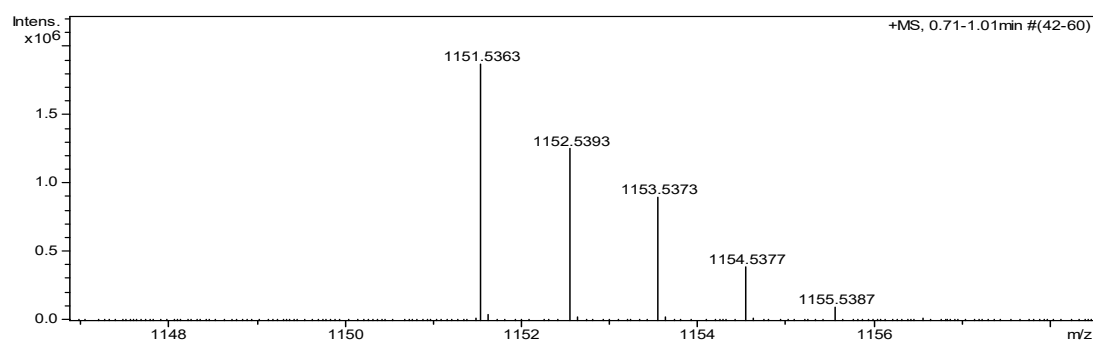

**Figure S14** Mass spectra of **2a** Calcd. for  $\text{C}_{66}\text{H}_{81}\text{ClN}_2\text{O}_{12}([\text{M} + \text{Na}]^+)$ : 1151.5376, found: 1151.5363.

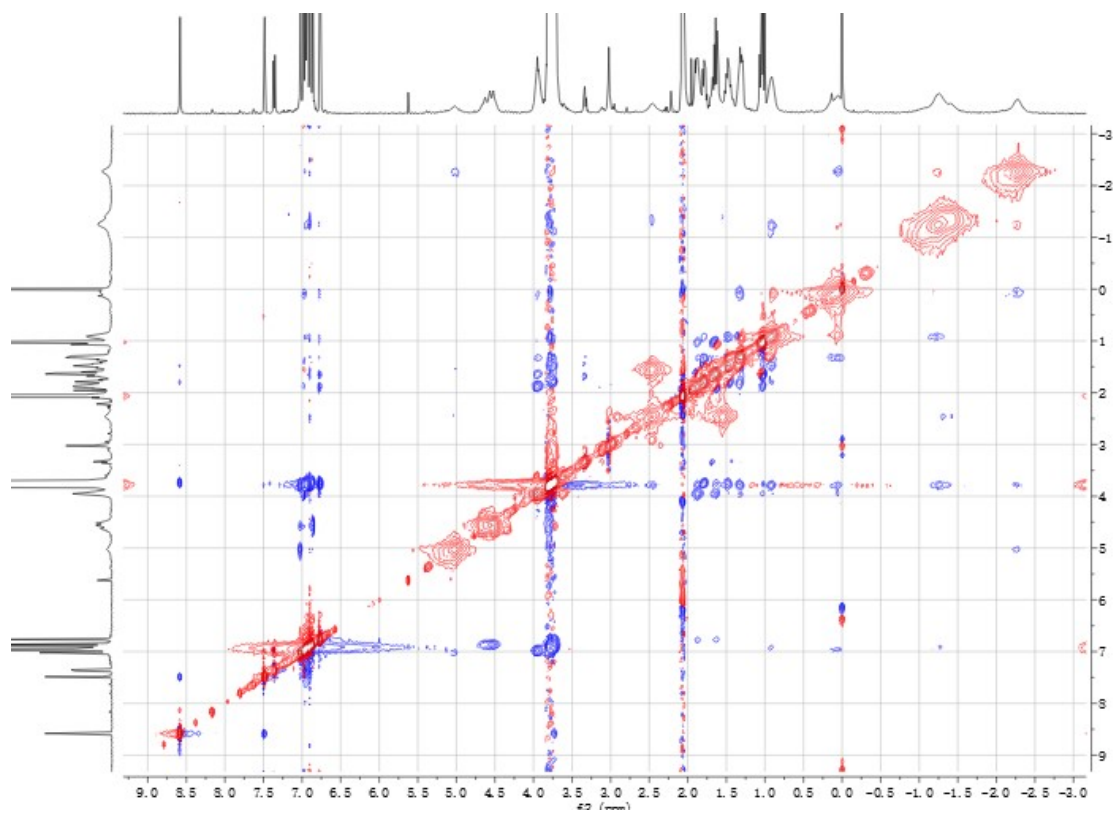

**Figure S15.** 2D NMR of **2b**.

**Table S2 Information of crystal data for 2b**

| Phase                                           |                                                                  |
|-------------------------------------------------|------------------------------------------------------------------|
| Empirical formula                               | C <sub>66</sub> H <sub>81</sub> ClN <sub>2</sub> O <sub>12</sub> |
| Formula weight                                  | 1129.77                                                          |
| Temperature(K)                                  | 296(2)                                                           |
| Wavelength(Å)                                   | 0.71073                                                          |
| Crystal system,                                 | Triclinic                                                        |
| space group                                     | P-1                                                              |
| a(Å)                                            | 12.2666(11)                                                      |
| b(Å)                                            | 14.3343(12)                                                      |
| c(Å)                                            | 18.0514(17)                                                      |
| α(°)                                            | 77.570(3)                                                        |
| β(°)                                            | 89.492(3)                                                        |
| γ(°)                                            | 77.501(3)                                                        |
| Volume(Å <sup>3</sup> )                         | 3023.8(5)                                                        |
| Z                                               | 2                                                                |
| Calculated density(Mg·m <sup>-3</sup> )         | 1.241                                                            |
| Absorption coefficient(mm <sup>-1</sup> )       | 0.127                                                            |
| F(000)                                          | 1208                                                             |
| Crystal size(mm)                                | 0.260 x 0.220 x 0.180                                            |
| Theta range for data collection(°)              | 2.095 to 26.000                                                  |
| <i>hkl</i> ranges                               | -15 to 13, -17 to 17, -22 to 22                                  |
| Reflections collected                           | 42851 / 11871                                                    |
| unique                                          | R(int)= 0.0699                                                   |
| Completeness to theta                           | 99.6%                                                            |
| Absorption correction                           | Semi-empirical from equivalents                                  |
| Refinement method                               | Full-matrix least-squares on F <sup>2</sup>                      |
| Data/restraints/parameters                      | 11871 / 138 / 740                                                |
| Goodness-of-fit on F <sup>2</sup>               | 1.014                                                            |
| Final R indices [I>2σ(I)]                       | R <sub>1</sub> = 0.0937,<br>wR <sub>2</sub> = 0.2368             |
| R indices (all data)                            | R <sub>1</sub> = 0.1988,<br>wR <sub>2</sub> = 0.2989             |
| Largest diff. peak and Hole(e·Å <sup>-3</sup> ) | 0.796 and -0.510                                                 |

## 4.

## Synthesis of M2

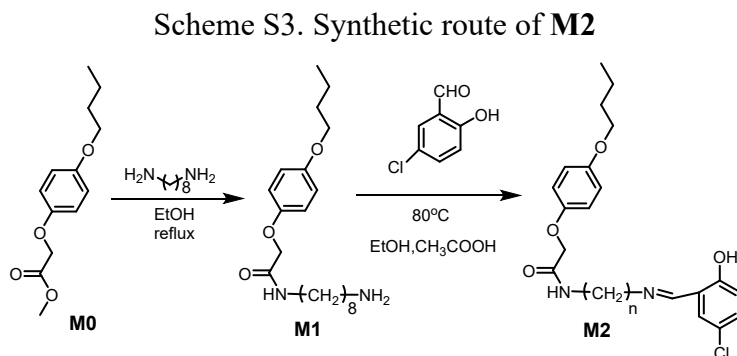

Synthesis of compound **M1**: **M0** (1 g, 4.2 mmol) and 1,8-octanediamine (6.463 g, 44.8 mmol) were added to 20 mL of anhydrous ethanol solution and reacted at 75°C for 12 hours. The organic solvent was removed by rotating under reduced pressure, and the compound **M1** was obtained by column chromatography (volume ratio: dichloromethane : methanol=10:1). White solid, 60%;  $^1\text{H NMR}$  (400 MHz,  $\text{CDCl}_3$ )  $\delta$  6.84 (s, 4H, ArH), 5.30 (s, 1H, NH), 4.42 (s, 2H,  $\text{CH}_2$ ), 3.91 (t,  $J = 6.5$  Hz, 2H,  $\text{CH}_2$ ), 3.36 – 3.29 (m, 2H,  $\text{CH}_2$ ), 2.67 (t,  $J = 7.0$  Hz, 2H,  $\text{CH}_2$ ), 1.78 – 1.70 (m, 2H,  $\text{CH}_2$ ), 1.57 – 1.39 (m, 10H,  $\text{CH}_2$ ), 1.30 (s, 4H,  $\text{CH}_2$ ), 0.97 (t,  $J = 7.4$  Hz, 3H,  $\text{CH}_3$ ).

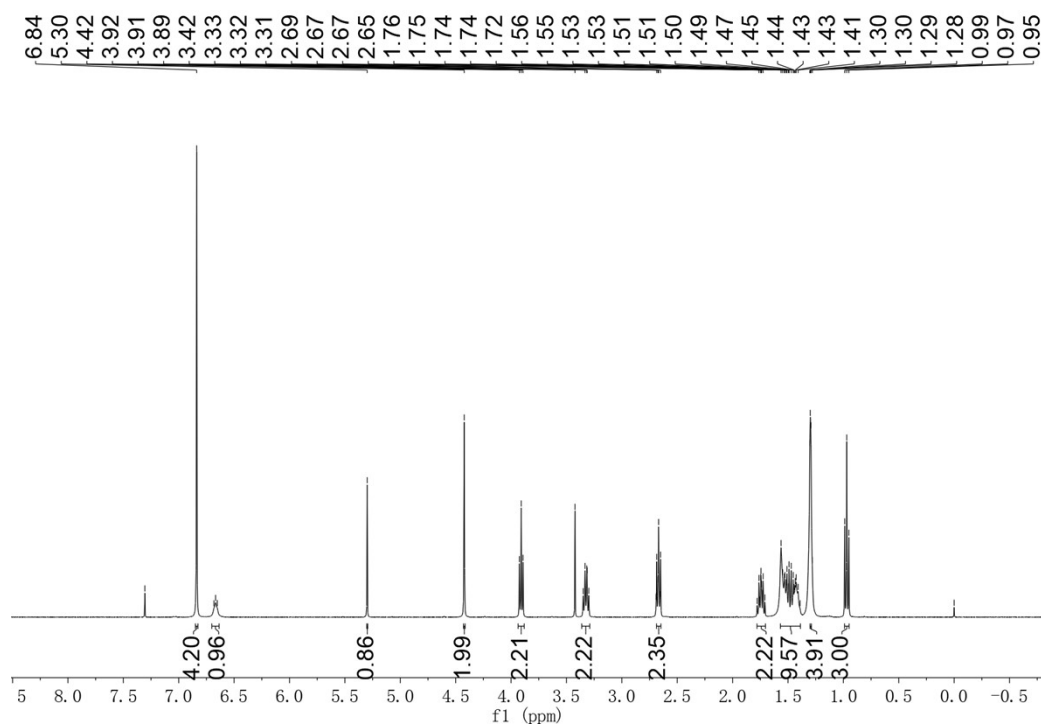

**Figure S16.**  $^1\text{H NMR}$  spectrum (400 MHz,  $\text{CDCl}_3$ , 293 K) of **M1**.



Synthesis of compound **M2**: **M1** (0.193 g, 0.55 mmol) and 5-chlorosalicylaldehyde (0.079 g, 0.5 mmol) were added to 20 mL of anhydrous ethanol solution and reacted at 80 °C for 4 hours. The organic solvent was removed by rotating under reduced pressure, and the compound **M2** was obtained by column chromatography (volume ratio: ethyl acetate: petroleum ether=1:5). Yellow solid, 50%; <sup>1</sup>H NMR (400 MHz, CDCl<sub>3</sub>) δ 13.64 (s, 1H, OH), 8.26 (s, 1H, CH), 7.25 – 7.20 (m, 1H, ArH), 6.89 (d, *J* = 8.6 Hz, 1H, ArH), 6.84 (s, 4H, ArH), 6.62 (d, *J* = 23.1 Hz, 1H, ArH), 4.43 (s, 2H, CH<sub>2</sub>), 3.91 (t, *J* = 6.5 Hz, 2H, CH<sub>2</sub>), 3.59 (t, *J* = 6.8 Hz, 2H, CH<sub>2</sub>), 3.33 (m, 2H, CH<sub>2</sub>), 1.72 (m, 4H, CH<sub>2</sub>), 1.50 – 1.44 (m, 2H, CH<sub>2</sub>), 1.30 (m, 10H, CH<sub>2</sub>), 0.97 (t, *J* = 7.4 Hz, 3H, CH<sub>3</sub>).

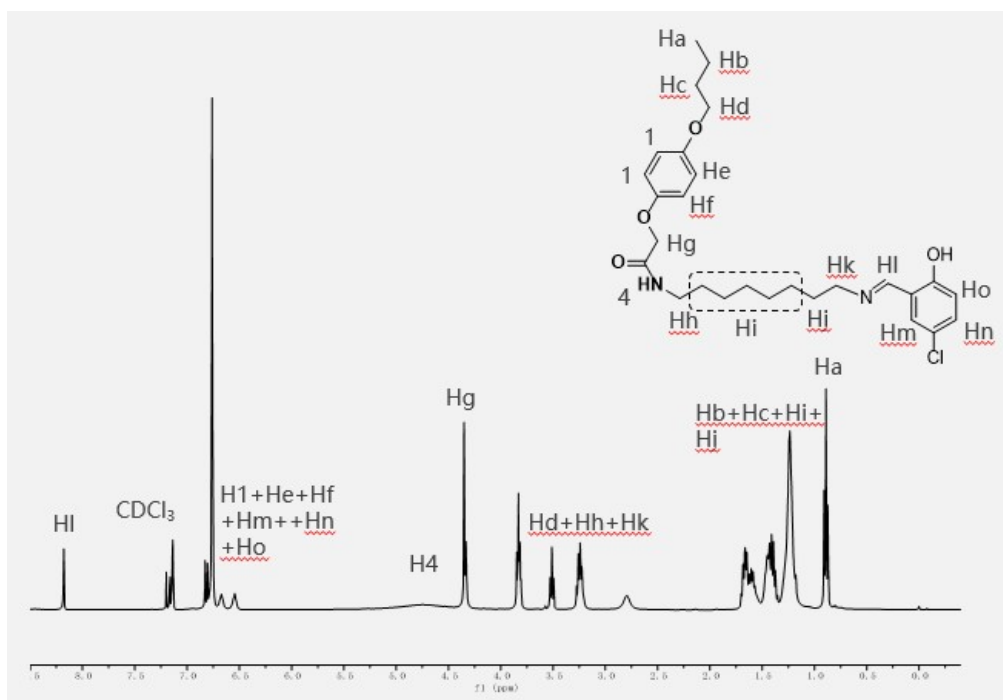

**Figure S17.** <sup>1</sup>H NMR spectrum (CDCl<sub>3</sub>, room temperature, 100 MHz) of **M2**.

## 5. Synthesis of 2b-Zn

**2b** (0.226 g, 0.20 mmol) and 0.022g CH<sub>3</sub>ONa were dissolved in 10 mL CH<sub>3</sub>OH, then Zn(CH<sub>3</sub>COO)<sub>2</sub> (0.018 g, 0.10 mmol) was added to the above solution, the mixture was reacted for 6 hours at room temperature. After the inorganic salts were removed by filtration, the organic solvent was collected and removed by rotating under reduced pressure, and the compound **2b-Zn** was obtained washing with CH<sub>3</sub>OH and CH<sub>3</sub>OCH<sub>3</sub>.

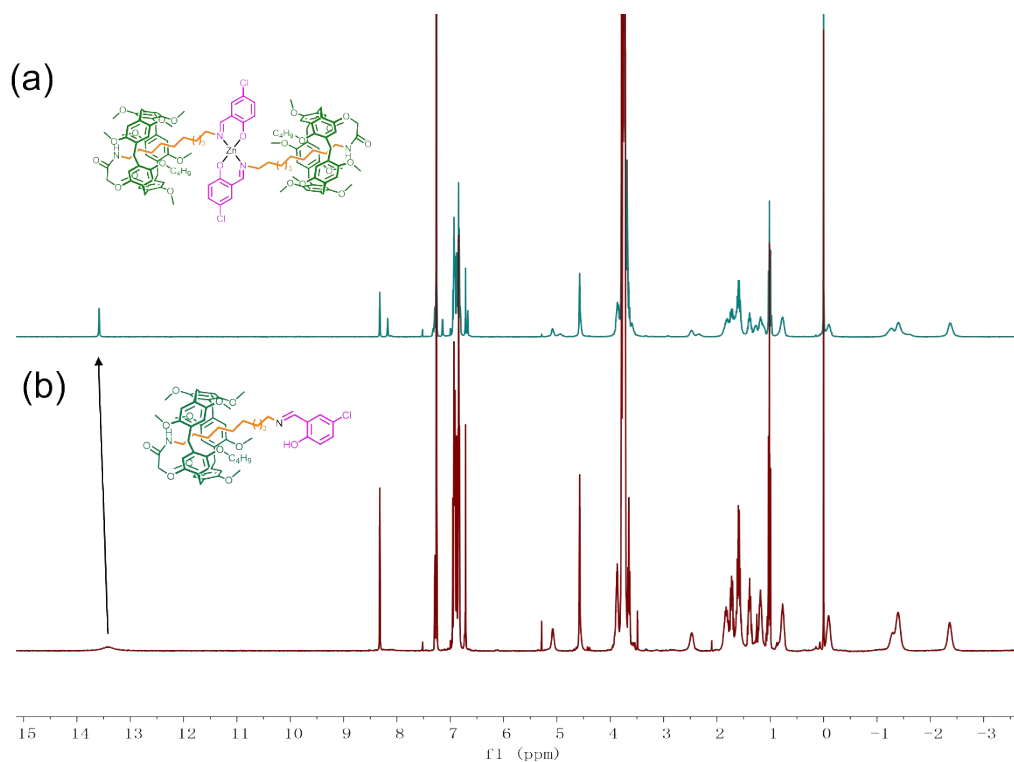

**Figure S18.** <sup>1</sup>H NMR spectra (400 MHz, CDCl<sub>3</sub>/Acetonitrile-D<sub>3</sub>, 298 K) of (a) **2b-Zn** and (b) **2b**.

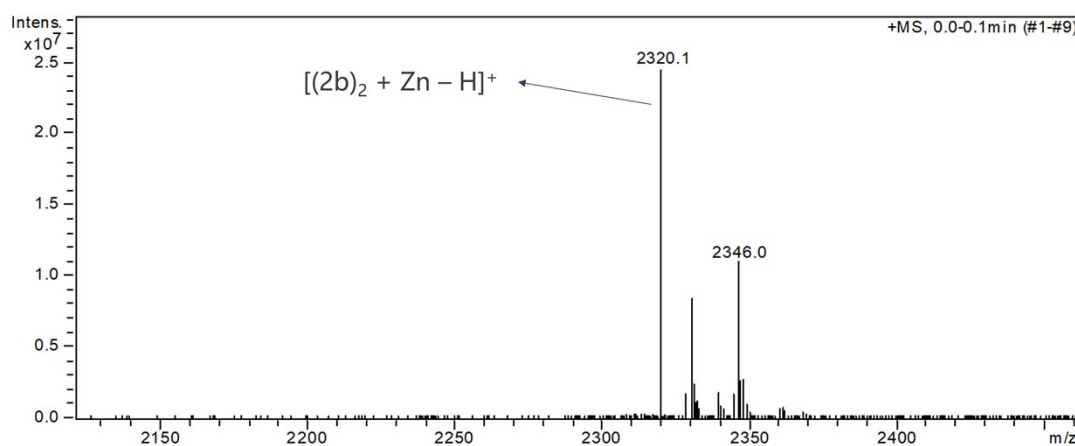

**Figure S19.** Mass spectra of complex, Calcd. for C<sub>132</sub>H<sub>161</sub>Cl<sub>2</sub>N<sub>4</sub>O<sub>24</sub> ([2 (**2b**) + Zn - H]<sup>+</sup>):

2320.0, found: 2320.1.

## 6. Fluorescence investigation

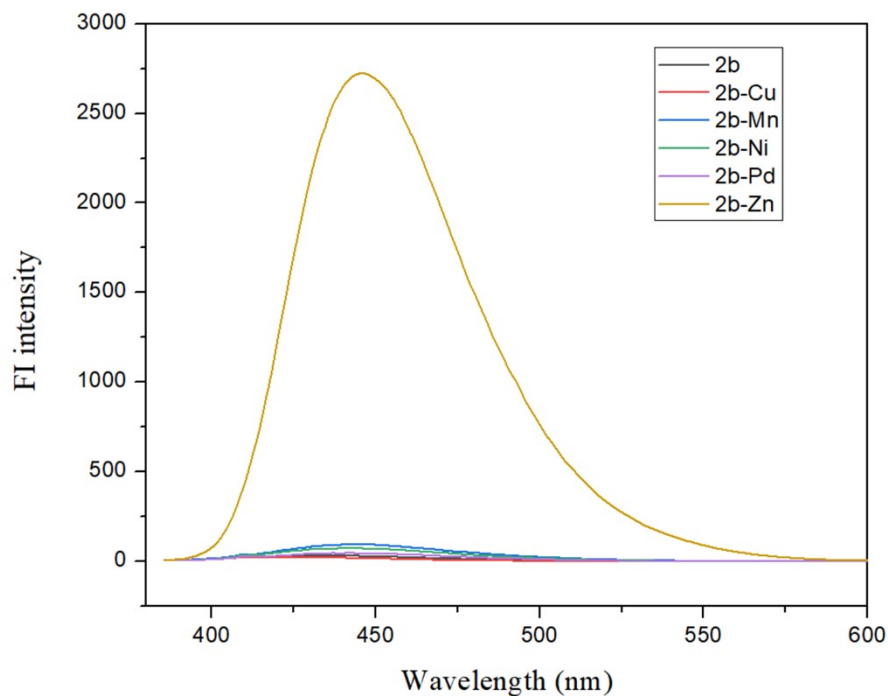

**Figure S20.** Fluorescence emission spectra of  $\text{CHCl}_3$  solution of **2b** complex with different metal ions. ( $[\text{C}] = 10^{-5} \text{ M}$ )

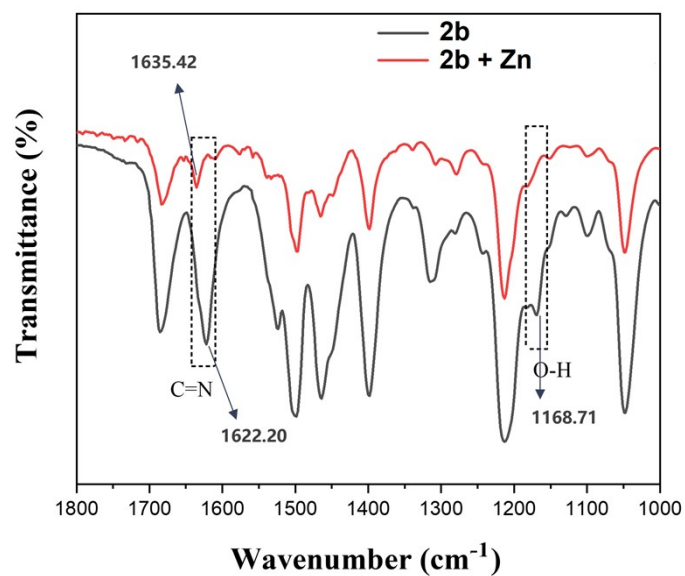

**Figure S21** HR-IR spectra of **2b** and **2b-Zn**.

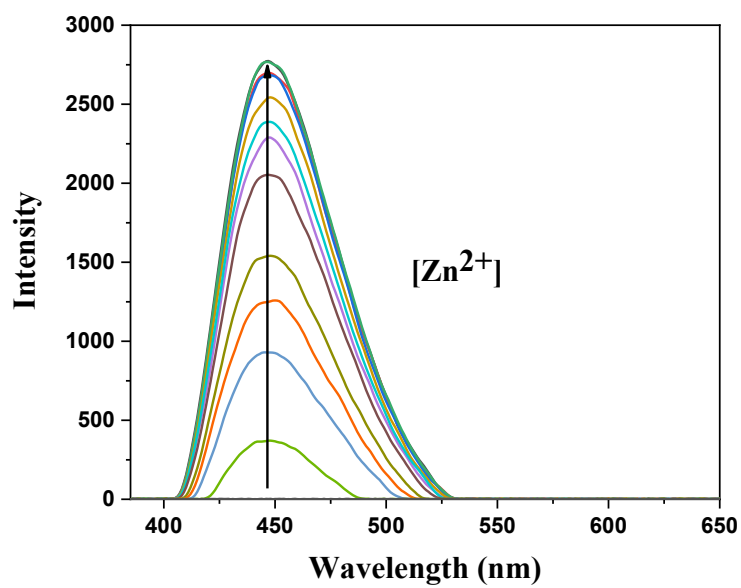

Fig. S22 Fluorescence titration spectra of **2b** with  $Zn^{2+}$

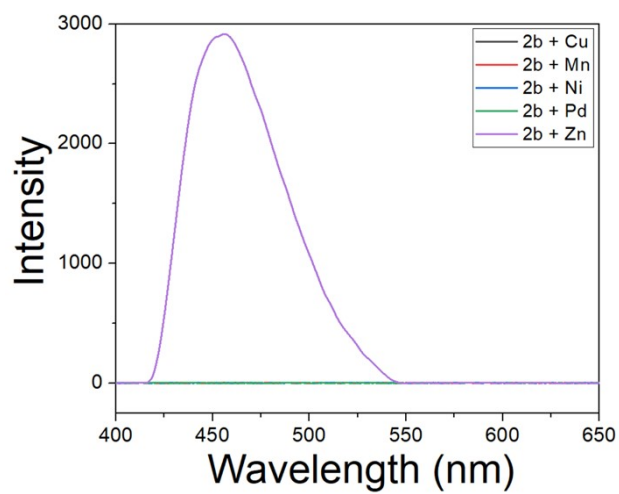

Fig. S23 Fluorescence emission spectra of thin solid films of **2b** with different metal ions.

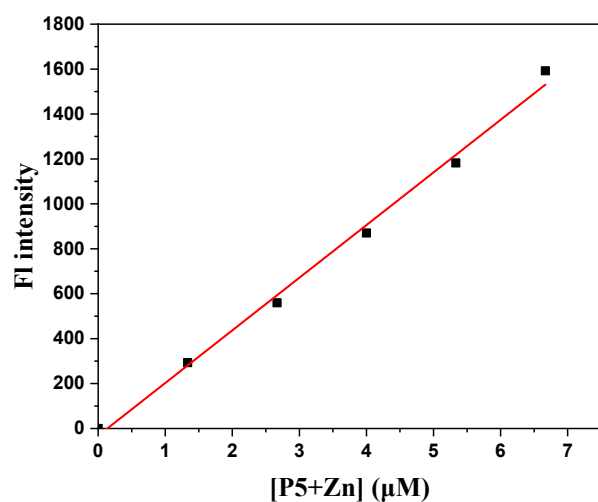

Fig. S24 The fluorescence intensity of **2b** against different concentration of  $\text{Zn}^{2+}$ .

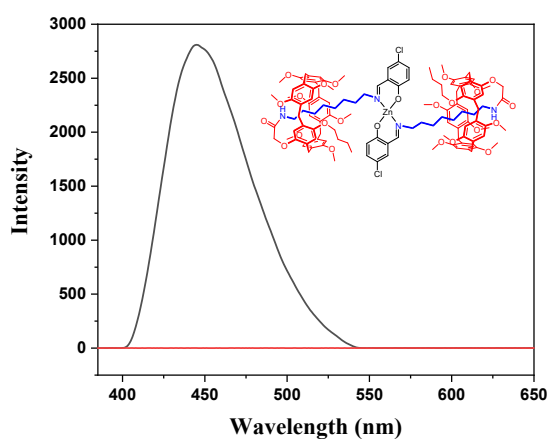

Figure S25. Fluorescence spectra of **2a@Zn** (black line) and **2a** (red line).

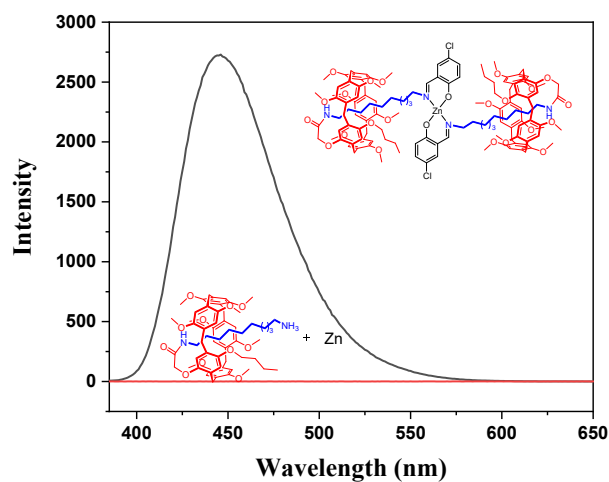

Figure S26 Fluorescence spectra of **2b@Zn** (black line) and **1b@Zn** (red line).

M1 :  $^{13}\text{C}$  NMR (101 MHz,  $\text{CDCl}_3$ )  $\delta$  168.42, 154.23, 151.21, 115.59, 115.52, 115.48, 77.32, 68.22, 68.15, 42.17, 42.14, 38.98, 33.73, 33.70, 31.34, 29.50, 29.33, 29.19, 26.82, 26.77, 19.22, 13.86;  
 MS (m/z): HRMS (ESI) Calcd. for  $\text{C}_{20}\text{H}_{34}\text{N}_2\text{O}_3$  ( $[\text{M}+\text{H}]^+$ ): 351.2648, found: 351.26288.

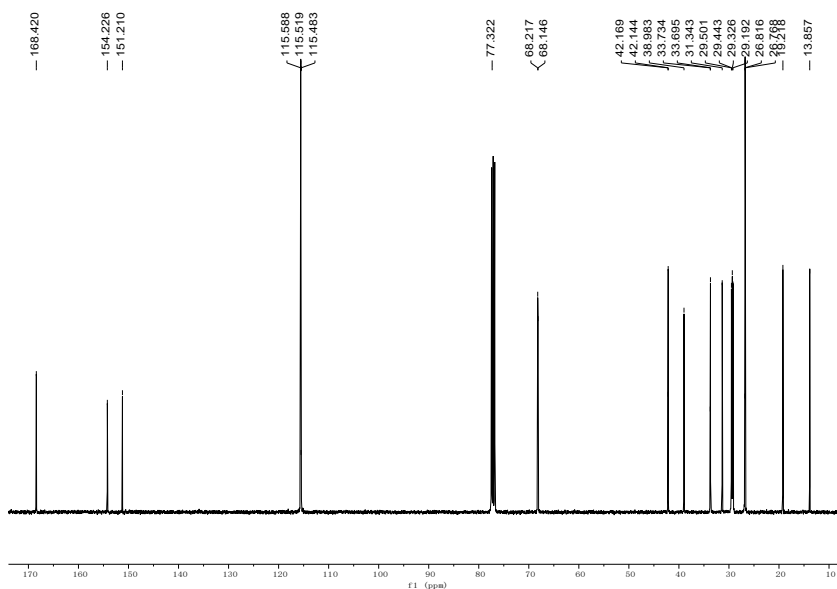

Fig. S27  $^{13}\text{C}$  NMR ( $\text{CDCl}_3$ , room temperature, 400 MHz) of M1.

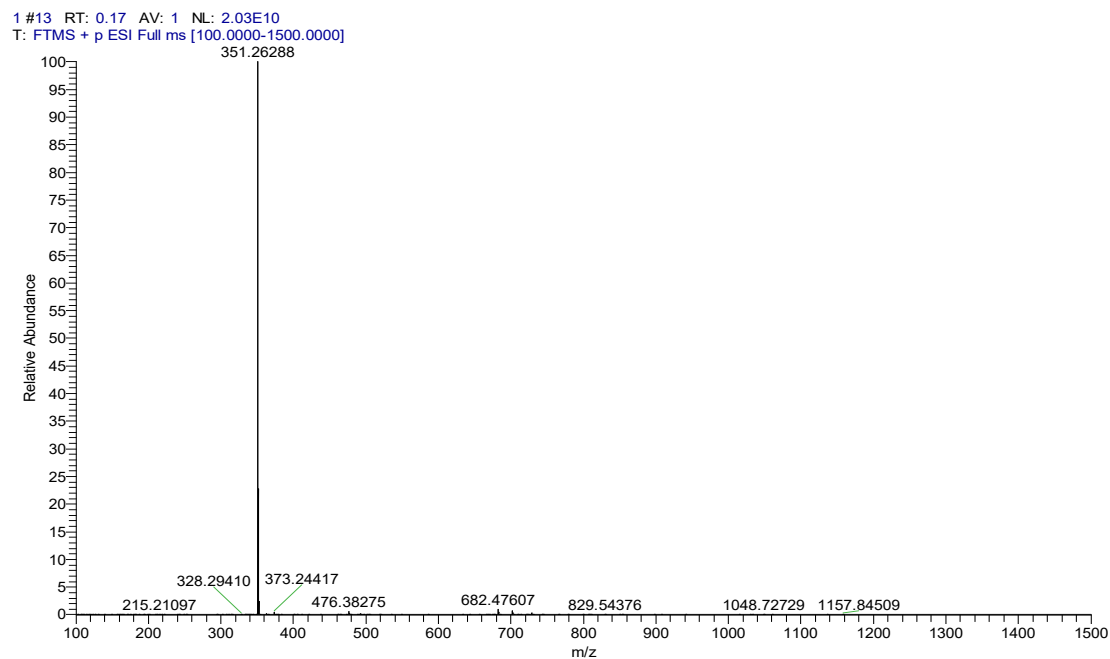

Fig. S28 MS spectrum of M1.

M2:  $^{13}\text{C}$  NMR (101 MHz,  $\text{CDCl}_3$ )  $\delta$  168.55, 168.43, 163.36, 160.05, 154.26, 151.22, 131.91, 130.21, 122.91, 119.47, 118.63, 115.66, 115.61, 115.51, 77.27, 68.25, 68.16, 68.13, 59.44, 40.39, 38.99, 38.96, 31.37, 30.68, 29.50, 29.15, 29.11, 28.94, 27.04, 26.76, 26.63, 26.49, 19.25, 13.88;  
 MS (m/z): HRMS (ESI) Calcd. for  $\text{C}_{27}\text{H}_{37}\text{ClN}_2\text{O}_4$  ( $[\text{M}+\text{H}]^+$ ): 489.2520, found: 489.24997.

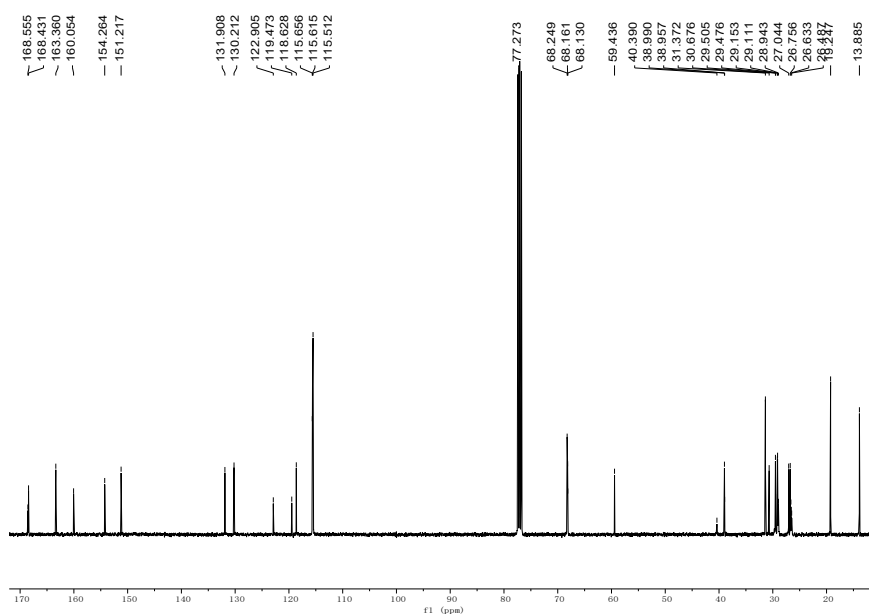

Fig. S29  $^{13}\text{C}$  NMR (101 MHz,  $\text{CDCl}_3$ ) spectrum of M2.

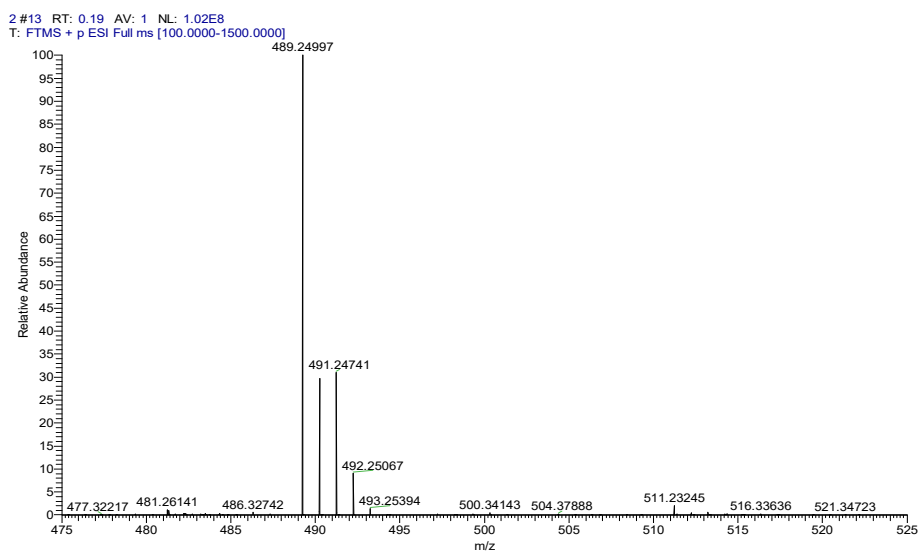

Fig. S30 MS spectrum of M2

## References

- S1. Runmiao Zhang, Chenwei Wang, Renhua Long, Tingting Chen, Chaoguo Yan, and Yong Yao, *Fron. Chem.*, **2019**, *7*, 508.
- S2. Runmiao Zhang, Xin Yan, Hao Guo, Lanping Hu, Chaoguo Yan, Yang Wang, and Yong Yao, *Chem. Commun.*, **2020**, *56*, 948-951.
